# Supplementary material for: Vertical farming for lettuce production in limited space: a case study in Northern Thailand
Source: PeerJ. 2024 Apr 10;12:e17085. doi: 10.7717/peerj.17085 (PMC11015828; doi:10.7717/peerj.17085)
Supplement: Supplemental Information 1 [file peerj-12-17085-s001.xlsx]

## Sheet: Plant Height&Canopy
	No.	Types	Maesurement Date	VF Level	Replications	Plant Height (mm)	Canopy Width (cm)	Fresh weight (g)	Dry Weight (g)	Light Use Efficiency (g/mol)
	1	Baby Cos	2022-02-14	Upper	1	7	9
	2	Baby Cos	2022-02-14	Upper	2	8	12
	3	Baby Cos	2022-02-14	Upper	3	8	10.5
	4	Baby Cos	2022-02-14	Middle	1	12.5	15
	5	Baby Cos	2022-02-14	Middle	2	12.5	12
	6	Baby Cos	2022-02-14	Middle	3	11	17.5
	7	Baby Cos	2022-02-14	Lower	1	11.5	15.5
	8	Baby Cos	2022-02-14	Lower	2	10.5	15.5
	9	Baby Cos	2022-02-14	Lower	3	9	20
	10	Baby Cos	2022-02-21	Upper	1	11	14.5
	11	Baby Cos	2022-02-21	Upper	2	10	14.5
	12	Baby Cos	2022-02-21	Upper	3	11	15
	13	Baby Cos	2022-02-21	Middle	1	13	16.5
	14	Baby Cos	2022-02-21	Middle	2	13	18
	15	Baby Cos	2022-02-21	Middle	3	13	18
	16	Baby Cos	2022-02-21	Lower	1	12	18
	17	Baby Cos	2022-02-21	Lower	2	11	18
	18	Baby Cos	2022-02-21	Lower	3	11	20.5
	19	Baby Cos	2022-02-28	Upper	1	13	18	88.76	4.83	0.109988
	20	Baby Cos	2022-02-28	Upper	2	12	19.5	80.86	4.38	0.100198
	21	Baby Cos	2022-02-28	Upper	3	13	16.5	83.79	4.47	0.103829
	22	Baby Cos	2022-02-28	Middle	1	17	20	115.25	4.77	0.263128
	23	Baby Cos	2022-02-28	Middle	2	16	20	132.15	3.7	0.301712
	24	Baby Cos	2022-02-28	Middle	3	16	19.5	123.85	5.42	0.282763
	25	Baby Cos	2022-02-28	Lower	1	15	22	98.94	3.5	0.274833
	26	Baby Cos	2022-02-28	Lower	2	16	23	100.71	4.32	0.27975
	27	Baby Cos	2022-02-28	Lower	3	16	21.5	78.9	4.93	0.219167
	28	Green Oak	2022-02-14	Upper	1	7	11.5
	29	Green Oak	2022-02-14	Upper	2	5	9.5
	30	Green Oak	2022-02-14	Upper	3	6	10
	31	Green Oak	2022-02-14	Middle	1	6	20.5
	32	Green Oak	2022-02-14	Middle	2	8	23.5
	33	Green Oak	2022-02-14	Middle	3	7	18.5
	34	Green Oak	2022-02-14	Lower	1	7	20.5
	35	Green Oak	2022-02-14	Lower	2	7	23.5
	36	Green Oak	2022-02-14	Lower	3	5	20.5
	37	Green Oak	2022-02-21	Upper	1	9	15
	38	Green Oak	2022-02-21	Upper	2	8	16
	39	Green Oak	2022-02-21	Upper	3	8	17
	40	Green Oak	2022-02-21	Middle	1	9	25.5
	41	Green Oak	2022-02-21	Middle	2	12	28
	42	Green Oak	2022-02-21	Middle	3	13	25.5
	43	Green Oak	2022-02-21	Lower	1	8	30
	44	Green Oak	2022-02-21	Lower	2	9	28.5
	45	Green Oak	2022-02-21	Lower	3	9	26.5
	46	Green Oak	2022-02-28	Upper	1	14	20	113.83	10.98	0.141053
	47	Green Oak	2022-02-28	Upper	2	13	25	81.2	7.6	0.10062
	48	Green Oak	2022-02-28	Upper	3	12	21	96.81	7.91	0.119963
	49	Green Oak	2022-02-28	Middle	1	14	26.5	175.11	8.54	0.399795
	50	Green Oak	2022-02-28	Middle	2	14	28	192.56	9.34	0.439635
	51	Green Oak	2022-02-28	Middle	3	14	29.5	204.36	10.4	0.466575
	52	Green Oak	2022-02-28	Lower	1	14	30	198.62	8.94	0.551722
	53	Green Oak	2022-02-28	Lower	2	15	30	236.83	11.15	0.657861
	54	Green Oak	2022-02-28	Lower	3	14	30	175.57	8.3	0.487694

## Sheet: PPFD&DLI
				Measurement Date
		PPFD	VF Level	2022-02-01	2022-02-02	2022-02-03	2022-02-04	2022-02-05	2022-02-06	2022-02-07	2022-02-08	2022-02-09	2022-02-10	2022-02-11	2022-02-12	2022-02-13	2022-02-14	2022-02-15	2022-02-16	2022-02-17	2022-02-18	2022-02-19	2022-02-20	2022-02-21	2022-02-22	2022-02-23	2022-02-24	2022-02-25	2022-02-26	2022-02-27	2022-02-28
			Upper	761.043	748.449	766.913	787.928	736.29	431.333	628.101	805.899	815.377	812.725	809.464	708.928	747.667	748.942	762.536	751.072	724.406	499.797	564.145	385.275	689.942	703.121	553.449	708.217	730.464	753.563	701.865	681.008
			Middle	483.37	469.092	468.274	471.785	434.227	259.545	367.56	441.377	431.396	454.348	452.5	412.435	383.565	373.664	389.06	373.464	356.812	246.928	339.561	242.634	391.261	384.045	302.015	376.042	409.594	431.159	409.507	394.594
			Lower	391.998	355.115	354.92	367.379	344.576	215.57	324.246	367.53	353.172	355.748	348.818	310.051	325.44	315.371	330.097	330.912	319.257	223.025	282.366	206.833	338.951	321.333	281.97	342.854	334.111	340.076	320.569	310.362
			Outside	712.87	704.435	717.043	698.565	699.043	624.435	896.174	1005.65	889.087	858.304	768.565	712.696	773.087	700.75	729.217	726.087	801.348	657.208	758.043	707.304	1113.78	849.042	839.375	947.208	893.208	875.083	795.125	757.875
				Measurement Date
			VF Level	2022-02-01	2022-02-02	2022-02-03	2022-02-04	2022-02-05	2022-02-06	2022-02-07	2022-02-08	2022-02-09	2022-02-10	2022-02-11	2022-02-12	2022-02-13	2022-02-14	2022-02-15	2022-02-16	2022-02-17	2022-02-18	2022-02-19	2022-02-20	2022-02-21	2022-02-22	2022-02-23	2022-02-24	2022-02-25	2022-02-26	2022-02-27	2022-02-28
		DLI	DLI-Up	31.5072	30.9858	31.7502	32.6202	30.4824	17.0808	26.0034	33.3642	33.7566	33.6468	33.5118	29.3496	30.9534	31.0062	31.569	31.0944	29.9904	20.6916	23.3556	15.9504	28.5636	27.8436	22.9128	29.3202	30.2412	31.6206	29.4558	28.5846	807.212
			DLI-Mid	20.0115	19.1634	19.1292	19.272	17.4588	10.278	14.8134	18.273	17.6292	16.2067	14.8223	14.0499	15.8796	15.0282	15.6318	15.2298	14.772	10.2228	13.4466	9.7536	16.1982	15.2082	12.3504	15.39	16.9572	17.85	16.9536	16.3362	438.316
			DLI-Low	15.9129	14.3166	14.3124	14.808	13.6452	8.304	12.669	14.8068	14.2278	14.3292	14.0538	12.4872	12.9474	12.708	13.2942	12.7218	12.4704	8.9694	10.8576	8.1906	13.6446	12.7248	11.349	13.8	13.4502	13.683	12.8982	12.4866	360.069
			Outside	29.5128	29.1636	29.6856	28.9206	28.9404	25.8516	37.1016	41.634	36.8082	35.5338	31.8186	29.5056	32.0058	30.2724	30.1896	30.06	33.1758	28.3914	31.383	29.2824	46.1106	36.6786	36.261	40.9194	38.5866	37.8036	34.3494	32.7402
